# Supplementary material for: Bioinformatic Prediction of WSSV-Host Protein-Protein Interaction
Source: Biomed Res Int. 2014 May 19;2014:416543. doi: 10.1155/2014/416543 (PMC4055298; doi:10.1155/2014/416543)
Supplement: Supplementary file 1 — Table S1 showed endogenous proteins interacting with predicted proteins from WSSV and shrimp. Five out of seven predicted WSSV proteins exhibit interactions with other WSSV proteins, while 31 out of 32 predicted shrimp proteins show interactions with other shrimp proteins. Table S2 showed GO and pathway analysis of interacting proteins between WSSV and the Chinese shrimp. GO analysis indicated that five predicted WSSV proteins and 23 predicted shrimp proteins had GO annotation. The following KEGG analysis revealed pathways that predicted proteins were involved in. [file 416543.f1.xlsx]

## Sheet: Table S1
Predicted Gene ID	Predicted Gene Annotation	Gene ID of Endogenous interacting proteins	Annotation of Endogenous interacting proteins
s_1099	thymidine kinase 1	s_18595	CG6704
		s_3684	CG7789
		s_3493	cell division control protein 2
s_12679	integrin alpha 5	s_17653	fms-related tyrosine kinase 4
		s_25665	fibronectin 1
		s_1537	integrin beta 1
		s_1294	talin 1
s_18988	integrin alpha 4	s_21444	Insulin-like receptor
		s_1537	beta[nu] integrin
		s_5849	multiple edematous wings
		s_2170	myospheroid
		s_22423	ultraspiracle
s_3390	integrin alpha 8	s_30884	Ecdysone receptor
		s_21444	Insulin-like receptor
		s_1537	beta[nu] integrin
		s_5849	multiple edematous wings
		s_2170	myospheroid
s_13286	annotation not avaliable(Anolis carolinensis)	s_2349	CG3011
		s_13958	E2F transcription factor
		s_21306	FBpp0083514
		s_18944	thymidylate synthase
		s_2204	mutagen-sensitive 209
s_16763	integrin beta 6	s_23243	fibronectin 1
		s_5849	integrin alpha 1
		s_6902	integrin alpha 4
		s_26063	integrin alpha 5
		s_5849	integrin alpha 6
s_1537	integrin beta 1	s_8242	Integrin-linked kinase
		s_5849	Integrin alpha gene ina-1
		s_7013	Lysosomal-associated membrane protein 1
		s_11802	Lysosomal-associated membrane protein 2
		s_26063	protein affected trafficking 2 (pat-2)
s_15702	beta-transducin repeat containing protein	s_1021	cadherin-associated protein beta 1
		s_5154	cullin 1
		s_9424	NF-kappa-B
		s_4681	nuclear factor of kappa light polypeptide gene enhancer in B-cells inhibitor alpha
		s_1059	S-phase kinase-associated protein 1
s_16017	nucleoside diphosphate kinase	s_4560	adenylate kinase
		s_4876	guanylate kinase
		s_14278	CTP synthetase
		s_20130	thymidylate kinase
		s_20382	uracil-DNA-glycosylase
s_1744	Ribonucleoside-diphosphate reductase small chain	s_18721	cell division cycle 45-like
		s_3493	cyclin-dependent kinase 1
		s_2204	proliferating cell nuclear antigen
		s_3879	ribonucleotide reductase M1
		s_18944	thymidylate synthetase
s_18721	Cell division control protein 45 homolog	s_37861	Sensitized chromosome inheritance modifier 19
		s_5394	Minichromosome maintenance 2
		s_7698	Minichromosome maintenance 3
		s_7944	Minichromosome maintenance 5
		s_6839	disc proliferation abnormal
s_18944	Probable thymidylate synthase	s_20130	CG5757
		s_13286	Dihydrofolate reductase
		s_21306	FBpp0083514
		s_1744	Ribonucleoside diphosphate reductase small subunit
		s_2204	mutagen-sensitive 209
s_20130	thymidylate kinase	s_3145	Replication protein A2
		s_1744	Ribonucleoside diphosphate reductase small subunit
		s_18944	thymidylate synthase
		s_60	abnormal wing discs
		s_3110	Deoxyuridine triphosphatase
s_20711	conserved hypothetical protein(Aedes aegypti)	s_20130	CG5757
		s_14278	CG6854
		s_2904	Dak1
		s_17657	RNA polymerase I 135kD subunit
s_2204	proliferating cell nuclear antigen	s_10089	CG18812
		s_22468	CG3732
		s_1855	CG5594
		s_3085	slamdance
s_2426	glycine dehydrogenase	s_2349	CG3011
		s_15935	CG3626
		s_6029	CG6385
		s_4685	CG6415
		s_1105	pumpless
s_2496	Syndecan	s_24189	CG3194
		s_3573	CG9298
		s_18063	Calcium/calmodulin-dependent protein kinase
		s_18648	dally-like
		s_7954	kon-tiki
s_2904	Probable uridylate kinase	s_20130	Thymidylate kinase
		s_7549	Deoxycytidylate deaminase
		s_5046	Uracil phosphoribosyltransferase
		s_5046	Uridine kinase
		s_60	Nucleoside diphosphate kinase
s_3110	annotation not avaliable (Anolis carolinensis)	s_20130	CG5757
		s_724	Histone H2A variant
		s_3145	Replication protein A2
		s_11854	Replication factor C 38kD subunit
		s_2204	mutagen-sensitive 209
s_3485	hypothetical protein (Branchiostoma floridae)	s_917	Elongin-B
		s_2323	Elongin-C
		s_15594	Cullin-2
		s_5154	lin19
		s_1059	skpA
s_386	adenylate kinase isoenzyme	s_24189	CG3194
		s_15084	Cyclin E
		s_8390	Heparan sulfate 6-O-sulfotransferase
		s_18648	dally-like
		s_35107	even skipped
s_3879	ribonucleotide reductase 1	s_20130	deoxythymidylate kinase
		s_6839	minichromosome maintenance complex component 4
		s_1744	ribonucleotide reductase M2
		s_1744	ribonucleotide reductase M2 B
		s_1618	transcription factor Dp-1
s_4560	Adenylate kinase	s_7162	Adenine phosphoribosyltransferase
		s_247	CG11255
		s_247	CG3809
		s_1744	Ribonucleoside diphosphate reductase small subunit
		s_60	abnormal wing discs
s_4876	Guanylate kinase	s_7162	Adenine phosphoribosyltransferase
		s_5707	CG8891
		s_1744	Ribonucleoside diphosphate reductase small subunit
		s_60	abnormal wing discs
		s_8594	burgundy
s_5154	hypothetical protein (Branchiostoma floridae)	s_15702	beta-transducin repeat containing
		s_15702	F-box and WD repeat domain containing 11
		s_3485	ring-box 1
		s_1059	S-phase kinase-associated protein 1
		s_18919	S-phase kinase-associated protein 2
s_5219	putative methylase/helicase	s_9628	EPH receptor B2
		s_14854	glucocorticoid receptor DNA binding factor 1
		s_2133	v-Ha-ras Harvey rat sarcoma viral oncogene homolog
		s_7429	platelet-derived growth factor receptor beta polypeptide
		s_9974	RAB33A
s_5545	adenylate kinase 3,	s_247	Ady43A
		s_7162	Adenine phosphoribosyltransferase
		s_247	CG11255
		s_247	CG3809
s_5707	inosine triphosphatase	s_3418	Adenylosuccinate synthetase
		s_18071	DNA-directed RNA polymerase III subunit RPC8
		s_750	Vacuolar ATP synthase subunit B
s_60	nucleoside diphosphate kinase	s_4379	ATP citrate lyase
		s_5707	CG8891
		s_268	Cyclophilin 1
		s_1342	FK506-binding protein 2
		s_3867	shibire
s_6839	minichromosome maintenance complex component 4	s_18721	CDC45 cell division cycle 45-like
		s_5394	minichromosome maintenance complex component 2
		s_7944	minichromosome maintenance complex component 5
		s_10386	minichromosome maintenance complex component 6
		s_6917	minichromosome maintenance complex component 7
s_6901	hypothetical protein (Branchiostoma floridae)	s_12575	Activin-beta
		s_8214	Smad anchor for receptor activation
		s_26943	baboon
		s_25170	lethal with a checkpoint kinase
		s_15947	punt
wsv001	Collagen triple helix repeat protein	wsv188	ribonucleotide reductase small subunit
		wsv172	ribonucleotide reductase large subunit RR1
wsv067	thymidylate synthetase	wsv395	thymidine kinase
		wsv188	ribonucleotide reductase small subunit
wsv112	dUTP diphosphatase	wsv067	thymidylate synthase-like
		wsv395	thymidine kinase
wsv172	Ribonucleoside-diphosphate reductase large chain	wsv188	ribonucleotide reductase small subunit
		wsv172	ribonucleotide reductase large subunit RR1
wsv188	Ribonucleoside-diphosphate reductase small chain	wsv172	ribonucleotide reductase large subunit RR1
		wsv067	thymidylate synthase-like

## Sheet: Table S2
Predicted Gene ID	Predicted Gene Annotation	GO_ID	GO_term	PATHWAY_ID	PATHWAY_name
s_1099	thymidine kinase 1	GO:0005622	intracellular	hsa00983	Drug metabolism - other enzymes
		GO:0044444	cytoplasmic part	hsa00240	Pyrimidine metabolism
		GO:0005737	cytoplasm
		GO:0005623	cell
		GO:0044424	intracellular part
		GO:0005575	cellular_component
		GO:0005829	cytosol
s_12679	integrin alpha 5	GO:0030056	hemidesmosome	hsa04512	ECM-receptor interaction
s_18988	integrin alpha 4	GO:0042995	cell projection	hsa05414	Dilated cardiomyopathy
s_3390	integrin alpha 8	GO:0044463	cell projection part	hsa05131	Shigellosis
		GO:0032153	cell division site	hsa05140	Leishmaniasis
		GO:0032154	cleavage furrow	hsa04514	Cell adhesion molecules (CAMs)
		GO:0043231	intracellular membrane-bounded organelle	hsa05130	Pathogenic Escherichia coli infection
		GO:0005622	intracellular	hsa05410	Hypertrophic cardiomyopathy (HCM)
		GO:0034667	alpha3-beta1 integrin complex	hsa04510	Focal adhesion
		GO:0005737	cytoplasm	hsa05412	Arrhythmogenic right ventricular cardiomyopathy (ARVC)
		GO:0009925	basal plasma membrane	hsa04360	Axon guidance
		GO:0014704	intercalated disc	hsa04670	Leukocyte transendothelial migration
		GO:0005911	cell-cell junction	hsa05200	Pathways in cancer
		GO:0043209	myelin sheath	hsa04145	Phagosome
		GO:0043227	membrane-bounded organelle	hsa05222	Small cell lung cancer
		GO:0043229	intracellular organelle	hsa05100	Bacterial invasion of epithelial cells
		GO:0030141	secretory granule	hsa04810	Regulation of actin cytoskeleton
		GO:0031252	cell leading edge
		GO:0035748	myelin sheath abaxonal region
		GO:0031253	cell projection membrane
		GO:0042470	melanosome
		GO:0031256	leading edge membrane
		GO:0001669	acrosomal vesicle
		GO:0031988	membrane-bounded vesicle
		GO:0045178	basal part of cell
		GO:0005578	proteinaceous extracellular matrix
		GO:0032587	ruffle membrane
		GO:0005576	extracellular region
		GO:0031410	cytoplasmic vesicle
		GO:0034678	alpha8-beta1 integrin complex
		GO:0001726	ruffle
		GO:0034679	alpha9-beta1 integrin complex
		GO:0031982	vesicle
		GO:0005604	basement membrane
		GO:0031012	extracellular matrix
		GO:0044444	cytoplasmic part
		GO:0032155	cell division site part
		GO:0016023	cytoplasmic membrane-bounded vesicle
		GO:0045121	membrane raft
		GO:0044424	intracellular part
		GO:0009897	external side of plasma membrane
		GO:0044420	extracellular matrix part
		GO:0044421	extracellular region part
s_13286	annotation not avaliable(Anolis carolinensis)	NONE		NONE
s_16763	integrin beta 6	GO:0043235	receptor complex	hsa04512	ECM-receptor interaction
s_1537	integrin beta 1	GO:0008305	integrin complex	hsa05414	Dilated cardiomyopathy
		GO:0043234	protein complex	hsa04514	Cell adhesion molecules (CAMs)
		GO:0044459	plasma membrane part	hsa05410	Hypertrophic cardiomyopathy (HCM)
		GO:0005887	integral to plasma membrane	hsa04510	Focal adhesion
		GO:0032991	macromolecular complex	hsa05412	Arrhythmogenic right ventricular cardiomyopathy (ARVC)
		GO:0031226	intrinsic to plasma membrane	hsa04810	Regulation of actin cytoskeleton
		GO:0031224	intrinsic to membrane
		GO:0016021	integral to membrane
		GO:0044425	membrane part
s_13825	hypothetical protein(Branchiostoma floridae)	GO:0005622	intracellular	bfo04710	Circadian rhythm - mammal
		GO:0043227	membrane-bounded organelle
		GO:0005623	cell
		GO:0043229	intracellular organelle
		GO:0005634	nucleus
		GO:0044424	intracellular part
		GO:0005575	cellular_component
		GO:0043231	intracellular membrane-bounded organelle
s_15702	beta-transducin repeat containing protein	NONE		bfo04340	Hedgehog signaling pathway
				bfo04710	Circadian rhythm - mammal
				bfo04120	Ubiquitin mediated proteolysis
				bfo04310	Wnt signaling pathway
s_16017	nucleoside diphosphate kinase	NONE		aag00230	Purine metabolism
				aag00240	Pyrimidine metabolism
s_1744	Ribonucleoside-diphosphate reductase small chain	GO:0005623	cell	spo00480	Glutathione metabolism
		GO:0005634	nucleus	spo00240	Pyrimidine metabolism
		GO:0005575	cellular_component	spo00230	Purine metabolism
		GO:0043231	intracellular membrane-bounded organelle
		GO:0005829	cytosol
		GO:0005622	intracellular
		GO:0043234	protein complex
		GO:0044444	cytoplasmic part
		GO:0005737	cytoplasm
		GO:0032991	macromolecular complex
		GO:0043227	membrane-bounded organelle
		GO:0043229	intracellular organelle
		GO:0005971	ribonucleoside-diphosphate reductase complex
		GO:0044424	intracellular part
s_18721	Cell division control protein 45 homolog	GO:0000790	nuclear chromatin	spo04111	Cell cycle - yeast
		GO:0005657	replication fork	spo04113	Meiosis - yeast
		GO:0005634	nucleus
		GO:0031974	membrane-enclosed lumen
		GO:0005829	cytosol
		GO:0043231	intracellular membrane-bounded organelle
		GO:0005622	intracellular
		GO:0005737	cytoplasm
		GO:0044454	nuclear chromosome part
		GO:0032991	macromolecular complex
		GO:0043227	membrane-bounded organelle
		GO:0043229	intracellular organelle
		GO:0043596	nuclear replication fork
		GO:0000785	chromatin
		GO:0005694	chromosome
		GO:0005623	cell
		GO:0000228	nuclear chromosome
		GO:0005575	cellular_component
		GO:0031981	nuclear lumen
		GO:0044451	nucleoplasm part
		GO:0043234	protein complex
		GO:0044444	cytoplasmic part
		GO:0043233	organelle lumen
		GO:0070013	intracellular organelle lumen
		GO:0043232	intracellular non-membrane-bounded organelle
		GO:0044428	nuclear part
		GO:0044446	intracellular organelle part
		GO:0044427	chromosomal part
		GO:0005654	nucleoplasm
		GO:0044424	intracellular part
		GO:0031261	DNA replication preinitiation complex
s_18944	Probable thymidylate synthase	GO:0005829	cytosol	spo00240	Pyrimidine metabolism
		GO:0044444	cytoplasmic part	spo00670	One carbon pool by folate
		GO:0005737	cytoplasm
		GO:0005622	intracellular
		GO:0044424	intracellular part
		GO:0005623	cell
		GO:0005575	cellular_component
s_20130	thymidylate kinase	GO:0005622	intracellular	hsa00240	Pyrimidine metabolism
		GO:0044444	cytoplasmic part
		GO:0005737	cytoplasm
		GO:0005623	cell
		GO:0044424	intracellular part
		GO:0005575	cellular_component
		GO:0005829	cytosol
s_20711	conserved hypothetical protein(Aedes aegypti)	NONE		aag00230	Purine metabolism
				aag00240	Pyrimidine metabolism
s_2204	proliferating cell nuclear antigen	GO:0043626	PCNA complex	hsa03410	Base excision repair
		GO:0005694	chromosome	hsa03030	DNA replication
		GO:0005657	replication fork	hsa04110	Cell cycle
		GO:0005634	nucleus	hsa03420	Nucleotide excision repair
		GO:0000228	nuclear chromosome	hsa03430	Mismatch repair
		GO:0043231	intracellular membrane-bounded organelle
		GO:0005737	cytoplasm
		GO:0043232	intracellular non-membrane-bounded organelle
		GO:0044454	nuclear chromosome part
		GO:0034399	nuclear periphery
		GO:0000307	cyclin-dependent protein kinase holoenzyme complex
		GO:0043227	membrane-bounded organelle
		GO:0015630	microtubule cytoskeleton
		GO:0005652	nuclear lamina
		GO:0070557	PCNA-p21 complex
		GO:0043229	intracellular organelle
		GO:0044427	chromosomal part
		GO:0005663	DNA replication factor C complex
		GO:0005654	nucleoplasm
		GO:0005856	cytoskeleton
		GO:0043596	nuclear replication fork
s_2426	glycine dehydrogenase	GO:0005623	cell	hsa00260	Glycine, serine and threonine metabolism
		GO:0005575	cellular_component
		GO:0043231	intracellular membrane-bounded organelle
		GO:0005622	intracellular
		GO:0005739	mitochondrion
		GO:0044444	cytoplasmic part
		GO:0005737	cytoplasm
		GO:0043227	membrane-bounded organelle
		GO:0043229	intracellular organelle
		GO:0044424	intracellular part
s_2496	Syndecan	GO:0030055	cell-substrate junction	hsa04512	ECM-receptor interaction
		GO:0030054	cell junction	hsa04514	Cell adhesion molecules (CAMs)
		GO:0031226	intrinsic to plasma membrane	hsa05144	Malaria
		GO:0030016	myofibril
		GO:0005622	intracellular
		GO:0016323	basolateral plasma membrane
		GO:0005737	cytoplasm
		GO:0005912	adherens junction
		GO:0043292	contractile fiber
		GO:0043229	intracellular organelle
		GO:0070161	anchoring junction
		GO:0009986	cell surface
		GO:0005576	extracellular region
		GO:0044444	cytoplasmic part
		GO:0043232	intracellular non-membrane-bounded organelle
		GO:0044449	contractile fiber part
		GO:0005887	integral to plasma membrane
		GO:0043034	costamere
		GO:0044424	intracellular part
		GO:0045121	membrane raft
		GO:0044422	organelle part
		GO:0005924	cell-substrate adherens junction
		GO:0005925	focal adhesion
s_2904	Probable uridylate kinase	GO:0005623	cell	spo00240	Pyrimidine metabolism
		GO:0005634	nucleus
		GO:0005575	cellular_component
		GO:0005829	cytosol
		GO:0043231	intracellular membrane-bounded organelle
		GO:0005622	intracellular
		GO:0044444	cytoplasmic part
		GO:0005737	cytoplasm
		GO:0043227	membrane-bounded organelle
		GO:0043229	intracellular organelle
		GO:0044424	intracellular part
s_3110	annotation not avaliable (Anolis carolinensis)	NONE		NONE
s_3485	hypothetical protein (Branchiostoma floridae)	NONE		bfo03420	Nucleotide excision repair
				bfo04710	Circadian rhythm - mammal
				bfo04120	Ubiquitin mediated proteolysis
				bfo04310	Wnt signaling pathway
				bfo04350	TGF-beta signaling pathway
s_386	adenylate kinase isoenzyme	NONE		aag00230	Purine metabolism
s_3879	ribonucleotide reductase 1	GO:0005634	nucleus	hsa00480	Glutathione metabolism
		GO:0031981	nuclear lumen	hsa00230	Purine metabolism
		GO:0031974	membrane-enclosed lumen	hsa00240	Pyrimidine metabolism
		GO:0043231	intracellular membrane-bounded organelle
		GO:0005829	cytosol
		GO:0043233	organelle lumen
		GO:0070013	intracellular organelle lumen
		GO:0044428	nuclear part
		GO:0043227	membrane-bounded organelle
		GO:0044446	intracellular organelle part
		GO:0043229	intracellular organelle
		GO:0005654	nucleoplasm
		GO:0044422	organelle part
s_4560	Adenylate kinase	GO:0016604	nuclear body	hsa03022	Basal transcription factors
		GO:0043233	organelle lumen
		GO:0070013	intracellular organelle lumen
		GO:0015030	Cajal body
		GO:0044428	nuclear part
		GO:0044446	intracellular organelle part
		GO:0005654	nucleoplasm
		GO:0031981	nuclear lumen
		GO:0044422	organelle part
		GO:0044451	nucleoplasm part
		GO:0031974	membrane-enclosed lumen
s_4876	Guanylate kinase	GO:0005737	cytoplasm	spo00230	Purine metabolism
		GO:0043231	intracellular membrane-bounded organelle
		GO:0043227	membrane-bounded organelle
		GO:0043229	intracellular organelle
		GO:0005622	intracellular
		GO:0044424	intracellular part
		GO:0005623	cell
		GO:0005575	cellular_component
		GO:0005634	nucleus
s_5154	hypothetical protein (Branchiostoma floridae)	GO:0005622	intracellular	bfo04710	Circadian rhythm - mammal
		GO:0031461	cullin-RING ubiquitin ligase complex	bfo04120	Ubiquitin mediated proteolysis
		GO:0043234	protein complex	bfo04310	Wnt signaling pathway
		GO:0032991	macromolecular complex	bfo04350	TGF-beta signaling pathway
		GO:0005623	cell
		GO:0000151	ubiquitin ligase complex
		GO:0044424	intracellular part
		GO:0005575	cellular_component
s_5219	putative methylase/helicase	NONE		NONE
s_5545	adenylate kinase 3,	NONE		aag00230	Purine metabolism
s_5707	inosine triphosphatase	GO:0005622	intracellular	hsa00983	Drug metabolism - other enzymes
		GO:0005737	cytoplasm	hsa00230	Purine metabolism
		GO:0005623	cell	hsa00240	Pyrimidine metabolism
		GO:0044424	intracellular part
		GO:0005575	cellular_component
s_60	nucleoside diphosphate kinase	GO:0031967	organelle envelope	sce00230	Purine metabolism
		GO:0031970	organelle envelope lumen	sce00240	Pyrimidine metabolism
		GO:0005740	mitochondrial envelope
		GO:0031974	membrane-enclosed lumen
		GO:0031975	envelope
		GO:0043231	intracellular membrane-bounded organelle
		GO:0005829	cytosol
		GO:0005739	mitochondrion
		GO:0005758	mitochondrial intermembrane space
		GO:0044444	cytoplasmic part
		GO:0043227	membrane-bounded organelle
		GO:0044429	mitochondrial part
		GO:0044446	intracellular organelle part
		GO:0043229	intracellular organelle
		GO:0044422	organelle part
s_6839	minichromosome maintenance complex component 4	GO:0005634	nucleus	hsa03030	DNA replication
		GO:0031974	membrane-enclosed lumen	hsa04110	Cell cycle
		GO:0043231	intracellular membrane-bounded organelle
		GO:0005622	intracellular
		GO:0044454	nuclear chromosome part
		GO:0032991	macromolecular complex
		GO:0043227	membrane-bounded organelle
		GO:0043229	intracellular organelle
		GO:0042555	MCM complex
		GO:0005694	chromosome
		GO:0005623	cell
		GO:0005575	cellular_component
		GO:0000228	nuclear chromosome
		GO:0031981	nuclear lumen
		GO:0044451	nucleoplasm part
		GO:0043234	protein complex
		GO:0043233	organelle lumen
		GO:0070013	intracellular organelle lumen
		GO:0043232	intracellular non-membrane-bounded organelle
		GO:0044428	nuclear part
		GO:0044446	intracellular organelle part
		GO:0044427	chromosomal part
		GO:0044424	intracellular part
		GO:0005654	nucleoplasm
		GO:0044422	organelle part
s_6901	hypothetical protein (Branchiostoma floridae)	GO:0005667	transcription factor complex	bfo04144	Endocytosis
		GO:0005623	cell	bfo04310	Wnt signaling pathway
		GO:0005634	nucleus	bfo04350	TGF-beta signaling pathway
		GO:0005575	cellular_component
		GO:0031981	nuclear lumen
		GO:0044451	nucleoplasm part
		GO:0031974	membrane-enclosed lumen
		GO:0043231	intracellular membrane-bounded organelle
		GO:0005622	intracellular
		GO:0043234	protein complex
		GO:0043233	organelle lumen
		GO:0070013	intracellular organelle lumen
		GO:0032991	macromolecular complex
		GO:0044428	nuclear part
		GO:0043227	membrane-bounded organelle
		GO:0044446	intracellular organelle part
		GO:0043229	intracellular organelle
		GO:0005654	nucleoplasm
		GO:0044424	intracellular part
		GO:0044422	organelle part
wsv001	Collagen triple helix repeat protein	GO:0031012	extracellular matrix	NONE
		GO:0005581	collagen
		GO:0005578	proteinaceous extracellular matrix
		GO:0005576	extracellular region
		GO:0005575	cellular_component
		GO:0044420	extracellular matrix part
		GO:0044421	extracellular region part
wsv026	hypothetical protein	NONE		NONE
wsv067	thymidylate synthetase	GO:0005743	mitochondrial inner membrane	NONE
		GO:0005634	nucleus
		GO:0005740	mitochondrial envelope
		GO:0031974	membrane-enclosed lumen
		GO:0031975	envelope
		GO:0043231	intracellular membrane-bounded organelle
		GO:0005739	mitochondrion
		GO:0005622	intracellular
		GO:0005737	cytoplasm
		GO:0005759	mitochondrial matrix
		GO:0019866	organelle inner membrane
		GO:0043227	membrane-bounded organelle
		GO:0031090	organelle membrane
		GO:0043229	intracellular organelle
		GO:0031967	organelle envelope
		GO:0031966	mitochondrial membrane
		GO:0005623	cell
		GO:0005575	cellular_component
		GO:0044444	cytoplasmic part
		GO:0043233	organelle lumen
		GO:0070013	intracellular organelle lumen
		GO:0016020	membrane
		GO:0044429	mitochondrial part
		GO:0044446	intracellular organelle part
		GO:0044424	intracellular part
		GO:0044422	organelle part
wsv112	dUTP diphosphatase	GO:0005622	intracellular	ddi00240	Pyrimidine metabolism
		GO:0005737	cytoplasm
		GO:0005623	cell
		GO:0044424	intracellular part
		GO:0005575	cellular_component
wsv128	hypothetical protein	NONE		bfo04710	Circadian rhythm - mammal
				bfo04120	Ubiquitin mediated proteolysis
				bfo04310	Wnt signaling pathway
				bfo04350	TGF-beta signaling pathway
wsv172	Ribonucleoside-diphosphate reductase large chain	GO:0005622	intracellular	cne00480	Glutathione metabolism
		GO:0043234	protein complex	cne00240	Pyrimidine metabolism
		GO:0044444	cytoplasmic part	cne00230	Purine metabolism
		GO:0005737	cytoplasm
		GO:0032991	macromolecular complex
		GO:0005623	cell
		GO:0005971	ribonucleoside-diphosphate reductase complex
		GO:0044424	intracellular part
		GO:0005575	cellular_component
wsv188	Ribonucleoside-diphosphate reductase small chain	GO:0005622	intracellular	aag00230	Purine metabolism
		GO:0043234	protein complex	aag00240	Pyrimidine metabolism
		GO:0044444	cytoplasmic part	aag00480	Glutathione metabolism
		GO:0005737	cytoplasm
		GO:0032991	macromolecular complex
		GO:0005623	cell
		GO:0005971	ribonucleoside-diphosphate reductase complex
		GO:0044424	intracellular part
		GO:0005575	cellular_component
